# Supplementary material for: Palladium(ii) thiocarboxamide complexes: synthesis, characterisation and application to catalytic Suzuki coupling reactions
Source: Royal Society of Chemistry journal article supplement (doi:10.1039/c2dt12243j), 2012-01-01
Supplement: c2dt12243j.pdf [file c2dt12243j.pdf]

## Supporting Information

For

### Palladium(II) thiocarboxamide complexes: Synthesis, characterisation and application to catalytic Suzuki coupling reactions

Elangovan Sindhuja<sup>a</sup>, Rengan Ramesh<sup>a\*</sup> and Yu Liu<sup>b</sup>

<sup>a</sup> *School of Chemistry, Bharathidasan University, Tiruchirappalli-620 024, Tamil Nadu, India.*

<sup>b</sup> *Institute of High Energy Physics, Chinese Academy of Sciences, Beijing-100049, China.*

\*To whom correspondence should be made: Tel: +91-431-2407053, Fax: +91-431-2407045, E-mail: ramesh\_bdu@yahoo.com

#### List of items:

1. <sup>1</sup>H NMR spectral data for all the coupling compounds.....S2- 4
2. Table of Elemental analysis data for the complexes 2a-d.....S5
3. Table of selected IR frequencies for the complexes 2a-d.....S6
4. Table of <sup>1</sup>H & <sup>31</sup>P NMR data for the complexes 2a-d.....S7
5. Spectrum for all the complexes 2a-d.....S8-19

## **<sup>1</sup>H NMR spectral data for the coupling compounds:**

**4-Methoxybiphenyl:** NMR (CDCl<sub>3</sub>): δ<sub>H</sub> (400 MHz) 7.46 (t, *J* = 8.8 Hz, 4H), 7.33 (t, *J* = 7.6 Hz, 2H), 7.24-7.20 (m, 1H),  
6.90 (d, *J* = 8.8 Hz, 2H), 3.77(s, 3H) ppm.

**4-Chloro-4'-methoxybiphenyl:** NMR (CDCl<sub>3</sub>): δ<sub>H</sub> (400 MHz) 7.48-7.44 (m, 2H), 7.33 (t, *J* = 7.2 Hz, 2H), 7.17 (d, *J* = 8.8 Hz, 2H),  
6.90 (d, *J* = 8.8 Hz, 2H), 3.77 (s, 3H) ppm.

**4'-Methoxy-4-methylbiphenyl:** NMR (CDCl<sub>3</sub>): δ<sub>H</sub> (400 MHz) 7.45 (d, *J* = 8.0 Hz, 4H), 7.33 (d, *J* = 7.2 Hz, 2H), 6.90 (d, *J* = 8.0 Hz, 2H),  
3.77 (s, 3H), 2.24 (s, 3H) ppm.

**4, 4'-Dimethoxybiphenyl:** NMR (CDCl<sub>3</sub>): δ<sub>H</sub> (400 MHz) 7.53 (t, *J* = 8.0 Hz, 2H), 7.43 (t, *J* = 7.2 Hz, 1H), 7.37 (d, *J* = 8.8 Hz, 2H),  
6.97(d, *J* = 8.8Hz, 1H), 6.77(d, *J* = 9.2 Hz, 2H), 3.77 (s, 6H) ppm.

**4-Methylbiphenyl:** NMR (CDCl<sub>3</sub>): δ<sub>H</sub> (400 MHz) 7.96 (d, *J* = 8.4 Hz, 2H), 7.62-7.54 (m, 4H), 7.54-7.34 (m, 2H), 7.32 (t, *J* = 7.6 Hz, 1H),  
2.31 (s, 3H) ppm.

**4-Chloro-4'-methylbiphenyl:** NMR (CDCl<sub>3</sub>): δ<sub>H</sub> (400 MHz) 8.21-8.19 (m, 2H), 7.65-7.63 (m, 2H), 7.46-7.44 (m, 2H), 7.23-7.18 (m, 2H),  
2.34 (s, 3H) ppm.

**4, 4'-Dimethylbiphenyl:** NMR (CDCl<sub>3</sub>): δ<sub>H</sub> (400 MHz) 7.41-7.34 (m, 4H), 7.17-7.13 (m, 4H), 2.30 (s, 6H) ppm.

**4-Methoxy-4'-methylbiphenyl:** NMR (CDCl<sub>3</sub>): δ<sub>H</sub> (400 MHz) 7.41-7.34 (m, 4H), 7.24-7.13 (m, 4H), 3.76 (s, 3H), 2.31 (s, 3H) ppm.

**5'-methyl-1,1':3',1''-terphenyl:** NMR (CDCl<sub>3</sub>): δ<sub>H</sub> (400 MHz) 7.95 (d, *J* = 8.0 Hz, 2H), 7.74-7.54 (m, 6H), 7.41-7.32 (m, 5H),  
2.31 (s, 3H) ppm.

**4,4''-dichloro-5'-methyl-1,1':3',1''-terphenyl:** NMR (CDCl<sub>3</sub>): δ<sub>H</sub> (400 MHz) 7.60-7.51 (m, 4H), 7.44-7.24 (m, 4H), 6.98-6.76 (m, 3H),  
2.31 (s, 3H) ppm.

**4,4'',5'-trimethyl-1,1':3',1''-terphenyl:** NMR (CDCl<sub>3</sub>): δ<sub>H</sub> (400 MHz) 7.39 (d, *J* = 8.4 Hz, 4H), 7.33 (t, *J* = 8.4 Hz, 4H),  
7.08 (d, *J* = 8.8 Hz, 2H), 6.68 (d, *J* = 8.8 Hz, 1H), 2.37 (s, 3H), 2.34 (s, 6H) ppm.

**4,4''-dimethoxy-5'-methyl-1,1':3',1''-terphenyl:** NMR (CDCl<sub>3</sub>): δ<sub>H</sub> (400 MHz) 7.40-7.37 (m, 4H), 7.28 (d, *J* = 8.0 Hz, 4H),  
6.88 (d, *J* = 8.8 Hz, 2H), 6.69 (d, *J* = 8.8 Hz, 1H), 3.75 (s, 6H), 2.31 (s, 3H) ppm.

**2-Phenylpyridine:** NMR (CDCl<sub>3</sub>): δ<sub>H</sub> (400 MHz) 8.21 (d, *J* = 7.6 Hz, 1H), 7.65 (d, *J* = 7.6 Hz, 3H), 7.46 (d, *J* = 7.2 Hz, 3H),  
7.21 (t, *J* = 8.0 Hz, 2H) ppm.

**2-(4'-Chlorophenyl)pyridine:** NMR (CDCl<sub>3</sub>): δ<sub>H</sub> (400 MHz) 8.04 (d, *J* = 8.8 Hz, 2H), 7.69 (d, *J* = 8.8 Hz, 2H), 7.64 (d, *J* = 8.8 Hz, 2H),  
7.42 (t, *J* = 8.4 Hz, 2H) ppm.

**2-(4'-Methylphenyl)pyridine:** NMR (CDCl<sub>3</sub>): δ<sub>H</sub> (400 MHz) 8.05 (d, *J* = 7.2 Hz, 1H), 7.81 (d, *J* = 8.0 Hz, 1H), 7.67-7.55 (m, 4H),  
7.23 (d, *J* = 9.6 Hz, 2H), 2.31 (s, 3H) ppm.

**2-(4'-Methoxyphenyl)pyridine:** NMR (CDCl<sub>3</sub>): δ<sub>H</sub> (400 MHz) 8.30-8.07 (m, 4H), 7.39 (d, *J* = 8.0 Hz, 2H), 6.93 (d, *J* = 8.0 Hz, 2H),  
3.80 (s, 3H) ppm.

**5-Methyl-2-phenylpyridine:** NMR (CDCl<sub>3</sub>): δ<sub>H</sub> (400 MHz) 8.51 (s, 1H), 7.97-7.94 (m, 2H), 7.75-7.62 (m, 3H), 7.45 (d, *J*=7.6 Hz, 2H),  
2.37 (s, 3H) ppm.

**2-(4'-Chlorophenyl)-5-Methylpyridine:** NMR (CDCl<sub>3</sub>): δ<sub>H</sub> (400 MHz) 8.43 (s, 1H), 7.82 (d, *J* = 8.4 Hz, 2H), 7.51 (t, *J* = 8.0 Hz, 2H),  
7.40 (d, *J* = 8.4Hz, 2H), 2.30 (s, 3H) ppm.

**2-(4'-Methylphenyl)-5-Methylpyridine:** NMR (CDCl<sub>3</sub>): δ<sub>H</sub> (400 MHz) 8.49 (s, 1H), 7.65-7.63 (m, 2H), 7.46-7.44 (m, 2H),  
7.22 (d, *J* = 8.0 Hz, 2H), 2.37 (s, 3H), 2.34 (s, 3H) ppm.

**2-(4'-Methoxyphenyl)-5-Methylpyridine:** NMR (CDCl<sub>3</sub>): δ<sub>H</sub> (400 MHz) 8.40 (s, 1H), 7.41-7.34 (m, 4H), 7.15 (d, *J* = 9.2 Hz, 3H),  
3.76 (s, 3H), 2.30 (s, 3H) ppm.

**2, 6-Diphenylpyridine:** NMR (CDCl<sub>3</sub>): δ<sub>H</sub> (400 MHz) 7.95 (d, *J* = 8.4 Hz, 2H), 7.62-7.54 (m, 6H), 7.41-7.32 (m, 5H) ppm.

**2, 6-Bis-(4'-chlorophenyl)pyridine:** NMR (CDCl<sub>3</sub>): δ<sub>H</sub> (400 MHz) 7.94 (d, *J* = 8.4 Hz, 2H), 7.60-7.53 (m, 4H), 7.40-7.36 (m, 5H) ppm.

**2, 6-Bis-(4'-methylphenyl)pyridine:** NMR (CDCl<sub>3</sub>): δ<sub>H</sub> (400 MHz) 7.75 (d, *J* = 8.8Hz, 4H), 7.53 (d, *J* = 8.4 Hz, 4H), 7.40-6.94 (m, 3H),  
2.31 (s, 6H) ppm.

**2, 6-Bis-(4'-methoxyphenyl)pyridine:** NMR (CDCl<sub>3</sub>): δ<sub>H</sub> (400 MHz) 7.89-7.86 (m, 2H), 7.41-7.38 (m, 4H), 7.28-7.26 (m, 1H),  
6.89 (t, *J* = 8.8 Hz, 4H), 3.77 (s, 6H) ppm.

**Table S1: Elemental Analysis data for Pd(II) thiocarboxamide complexes**

| Complexes                                                                                              | Empirical<br>Formula                                                | Calculated (Found) |            |            |            |
|--------------------------------------------------------------------------------------------------------|---------------------------------------------------------------------|--------------------|------------|------------|------------|
|                                                                                                        |                                                                     | C%                 | H%         | N%         | S%         |
| [Pd(Cl)( $\kappa^2$ - <i>S,N</i> -C <sub>6</sub> H <sub>4</sub> CS=N-(2-ClPh)(PPh <sub>3</sub> )] (2a) | C <sub>30</sub> H <sub>23</sub> Cl <sub>2</sub> N <sub>2</sub> PPdS | 55.27(55.09)       | 3.56(3.54) | 4.30(4.28) | 4.92(4.90) |
| [Pd(Cl)( $\kappa^2$ - <i>S,N</i> -C <sub>6</sub> H <sub>4</sub> CS=N-(2-MePh)(PPh <sub>3</sub> )] (2b) | C <sub>31</sub> H <sub>26</sub> ClN <sub>2</sub> PPdS               | 58.96(58.81)       | 4.15(4.17) | 4.44(4.46) | 5.08(5.05) |
| [Pd(Cl)( $\kappa^2$ - <i>S,N</i> -C <sub>6</sub> H <sub>4</sub> CS=N-(4-MePh)(PPh <sub>3</sub> )] (2c) | C <sub>31</sub> H <sub>26</sub> ClN <sub>2</sub> PPdS               | 58.96(59.10)       | 4.15(4.18) | 4.44(4.42) | 5.08(5.09) |
| [Pd(Cl)( $\kappa^2$ - <i>S,N</i> -C <sub>6</sub> H <sub>4</sub> CS=N-(4-Py)(PPh <sub>3</sub> )] (2d)   | C <sub>29</sub> H <sub>23</sub> ClN <sub>3</sub> PPdS               | 56.32(56.17)       | 3.75(3.72) | 6.79(6.76) | 5.18(5.18) |

**Table S2: Selected IR spectral data of Pd(II) thiocarboxamide complexes**

| Complexes | $\nu_{(\text{C-S})}$<br>( $\text{cm}^{-1}$ ) | $\nu_{(\text{C=N})}$<br>( $\text{cm}^{-1}$ ) |
|-----------|----------------------------------------------|----------------------------------------------|
| 2a        | 1281                                         | 1562                                         |
| 2b        | 1275                                         | 1545                                         |
| 2c        | 1267                                         | 1549                                         |
| 2d        | 1277                                         | 1553                                         |

**Table S3:  $^1\text{H}$  &  $^{31}\text{P}$  NMR spectral data of Pd(II) thiocarboxamide complexes**

| Complexes | $^1\text{H}$ NMR data (ppm) |                            |                     | $^{31}\text{P}$ NMR data (ppm) |
|-----------|-----------------------------|----------------------------|---------------------|--------------------------------|
|           | Ar-H (t)(1-H)               | Ar-H, PPh <sub>3</sub> (m) | CH <sub>3</sub> (s) | PPh <sub>3</sub> (s)           |
| 2a        | 9.58(d)                     | 7.65-7.25                  | -                   | 30.76                          |
| 2b        | 9.58                        | 7.93-6.86                  | 2.10                | 31.03                          |
| 2c        | 9.79                        | 7.89-6.99                  | 2.25                | 30.92                          |
| 2d        | 9.59                        | 8.34-6.85                  | -                   | 30.59                          |

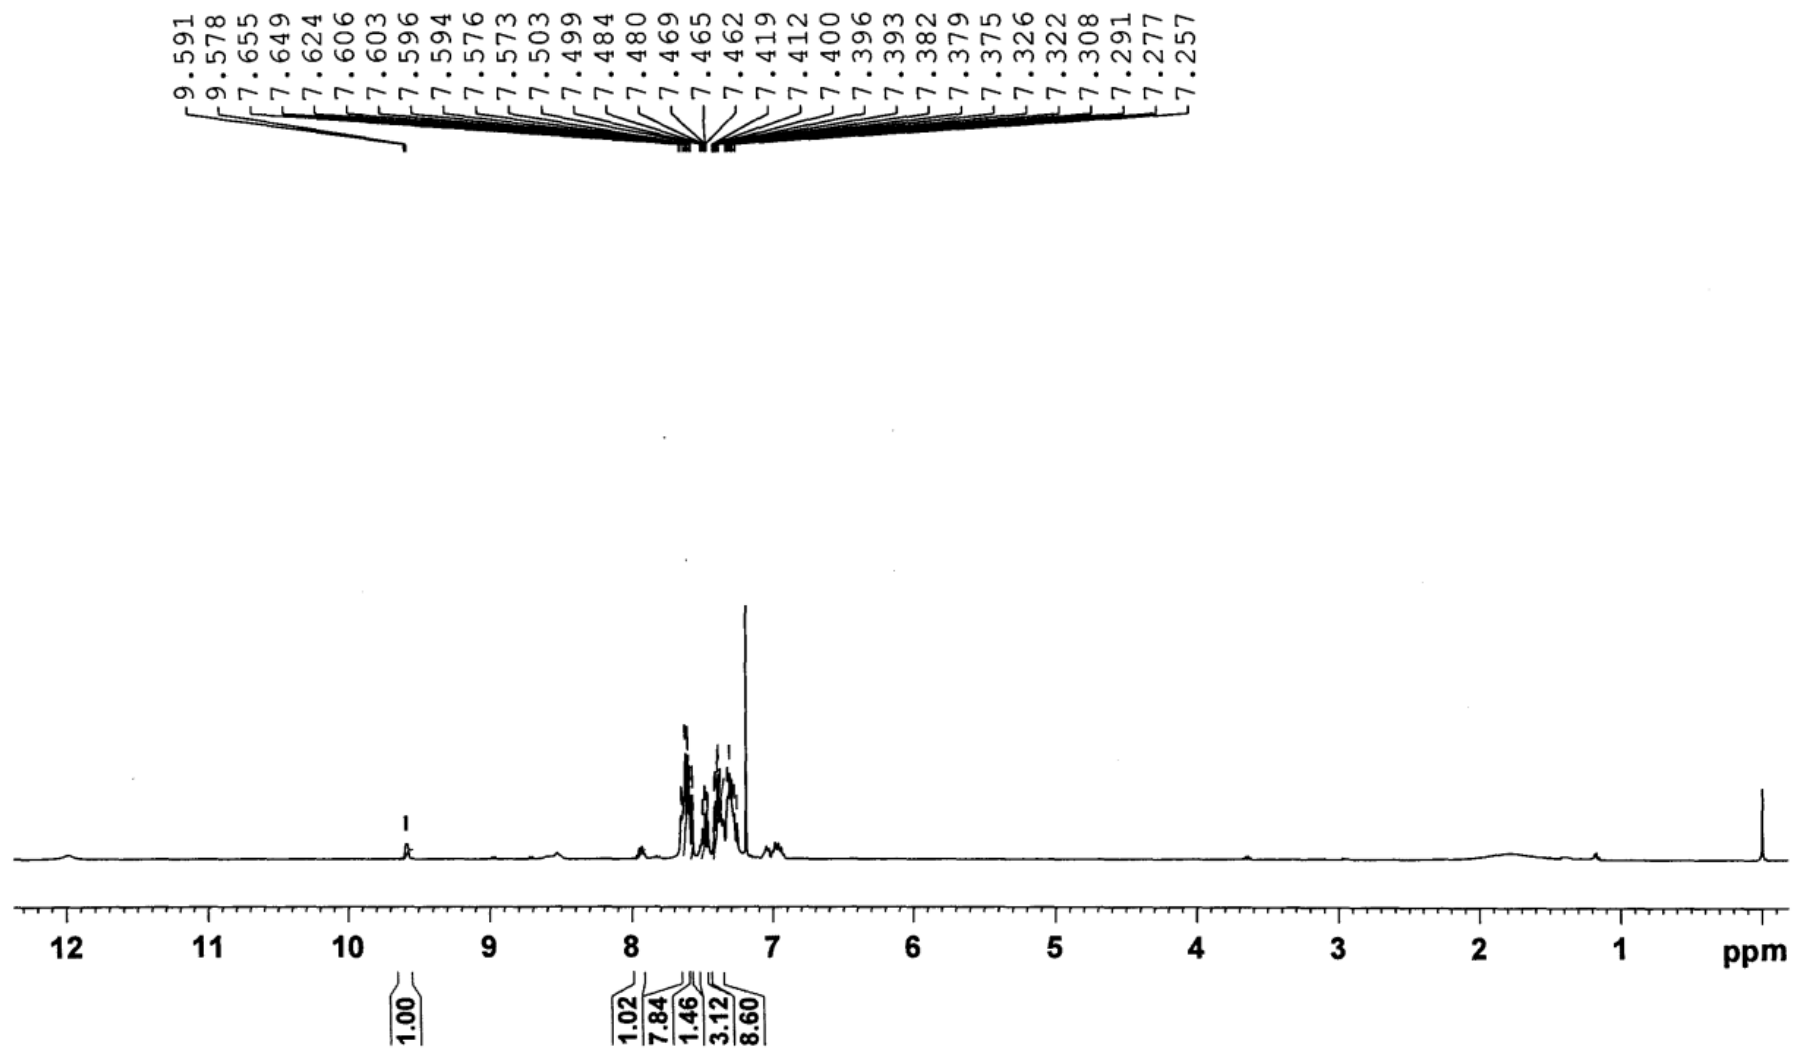

Figure S1:  $^1\text{H}$  NMR for Pd(II) thiocarboxamide Complex **2a**



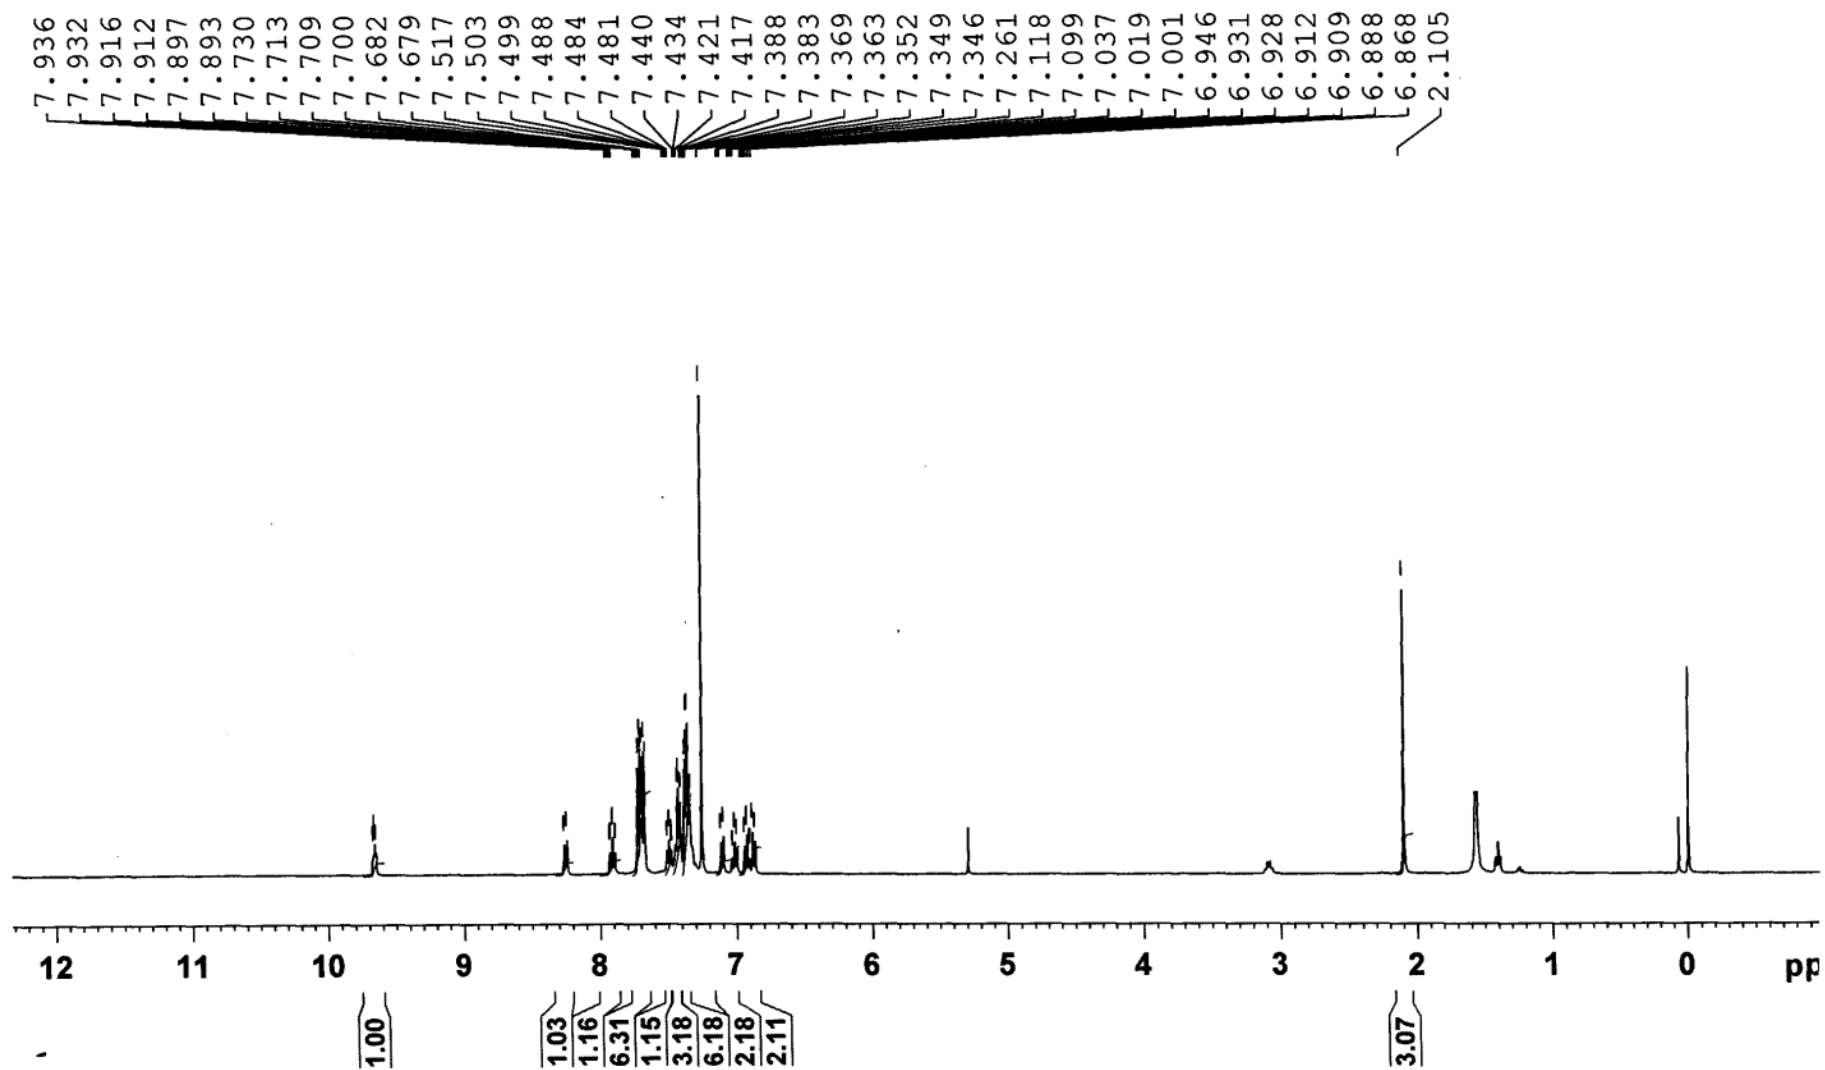

Figure S2:  $^1\text{H}$  NMR for Pd(II) thiocarboxamide Complex **2b**

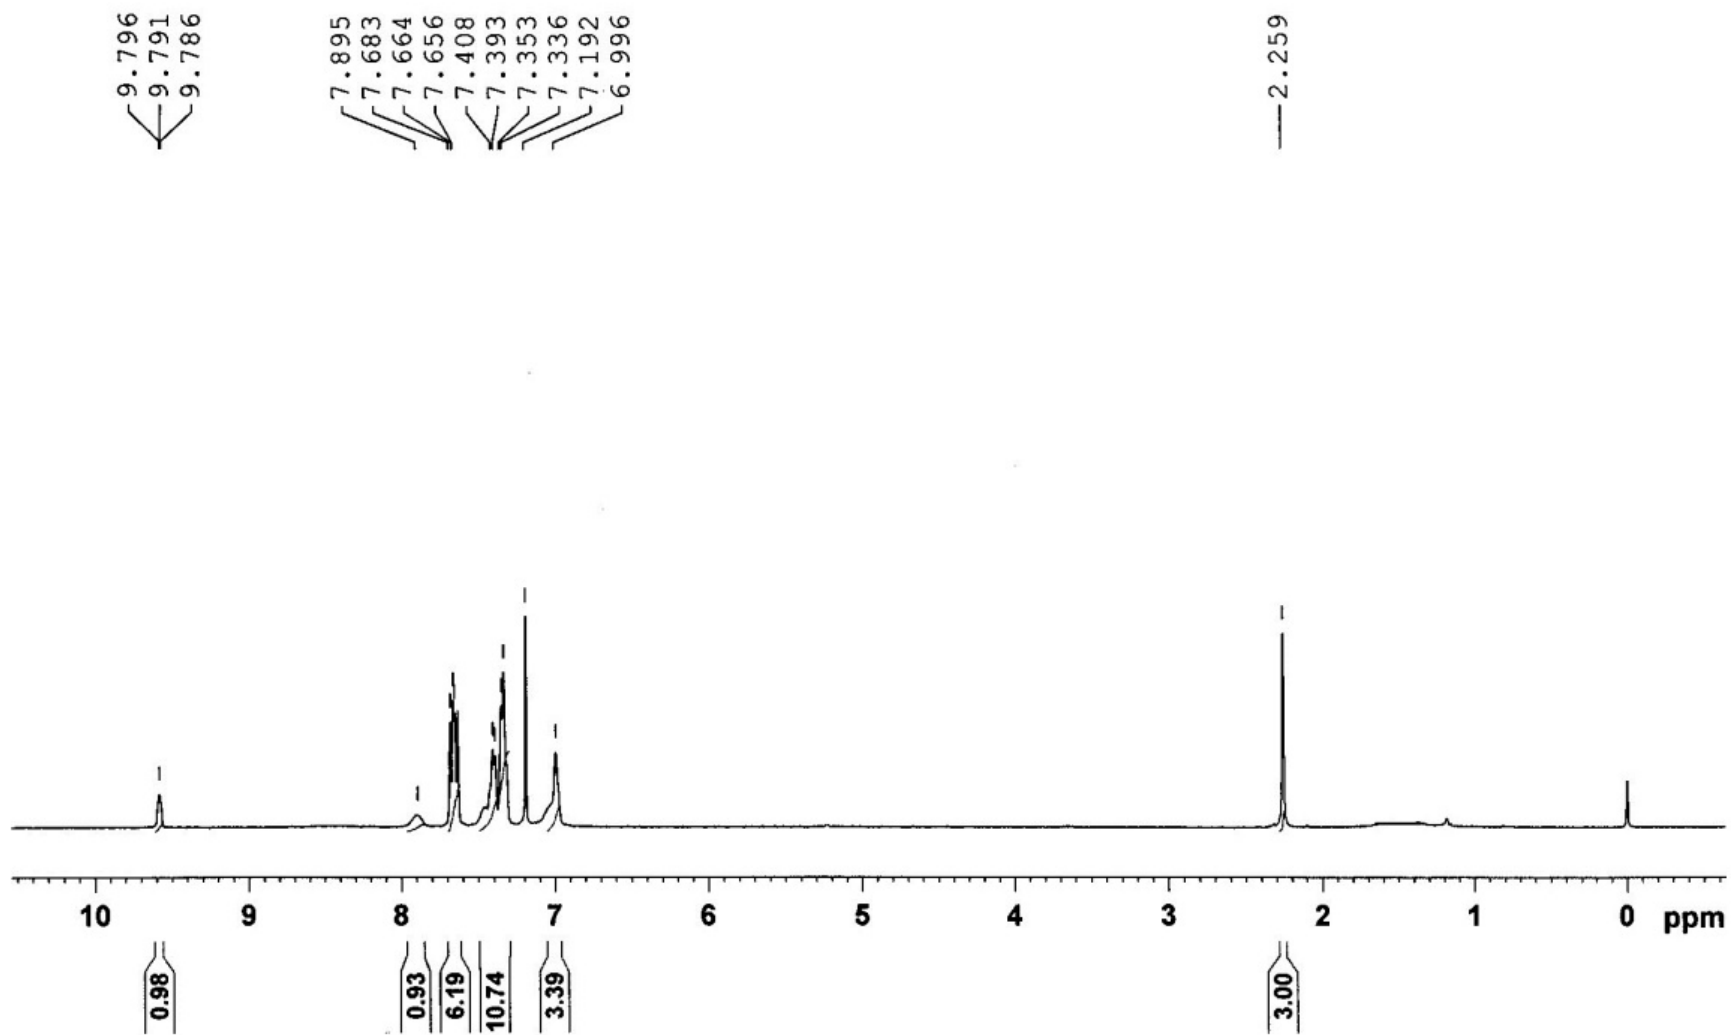

Figure S3:  $^1\text{H}$  NMR for Pd(II) thiocarboxamide Complex **2c**

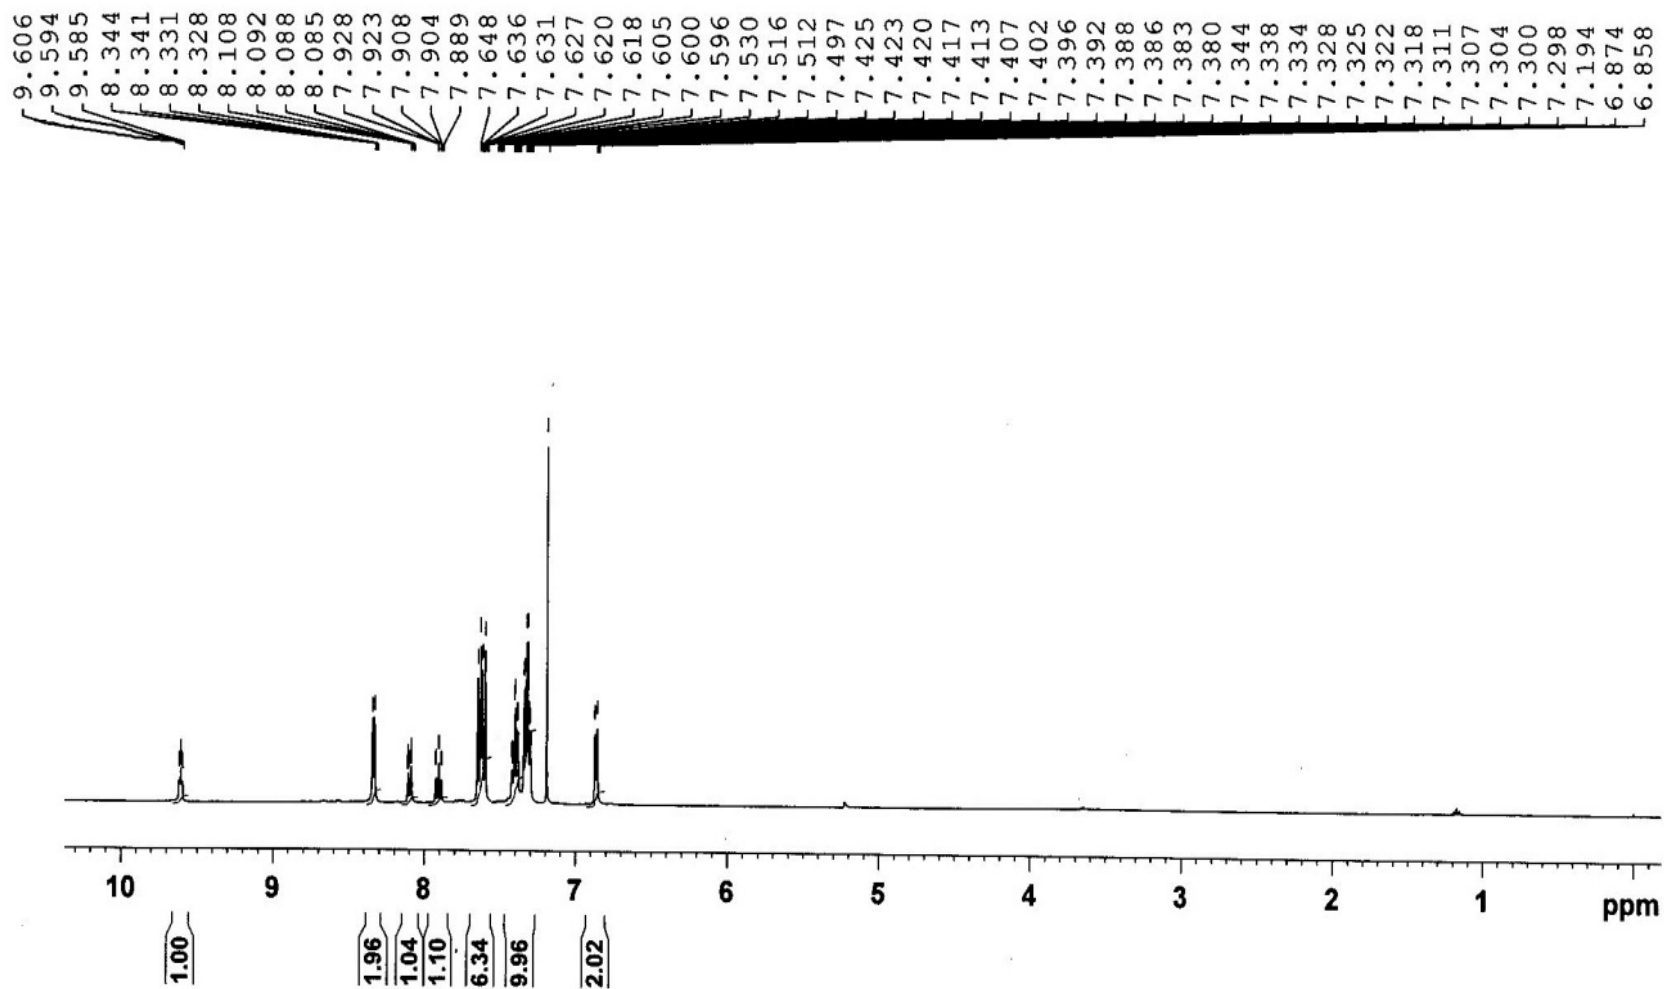

Figure S4: <sup>1</sup>H NMR for Pd(II) thiocarboxamide Complex 2d

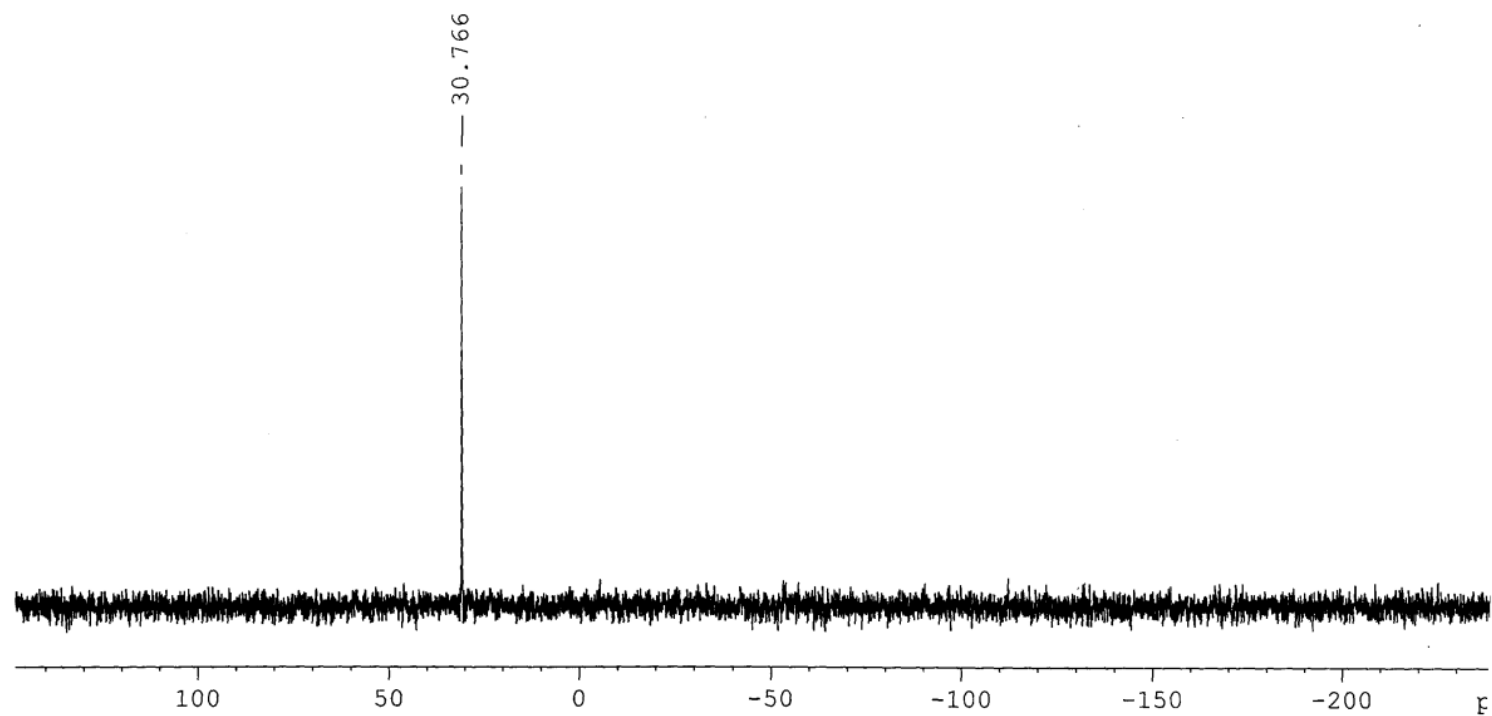

Figure S5:  $^{31}\text{P}$  NMR for Pd(II) thiocarboxamide Complex **2a**

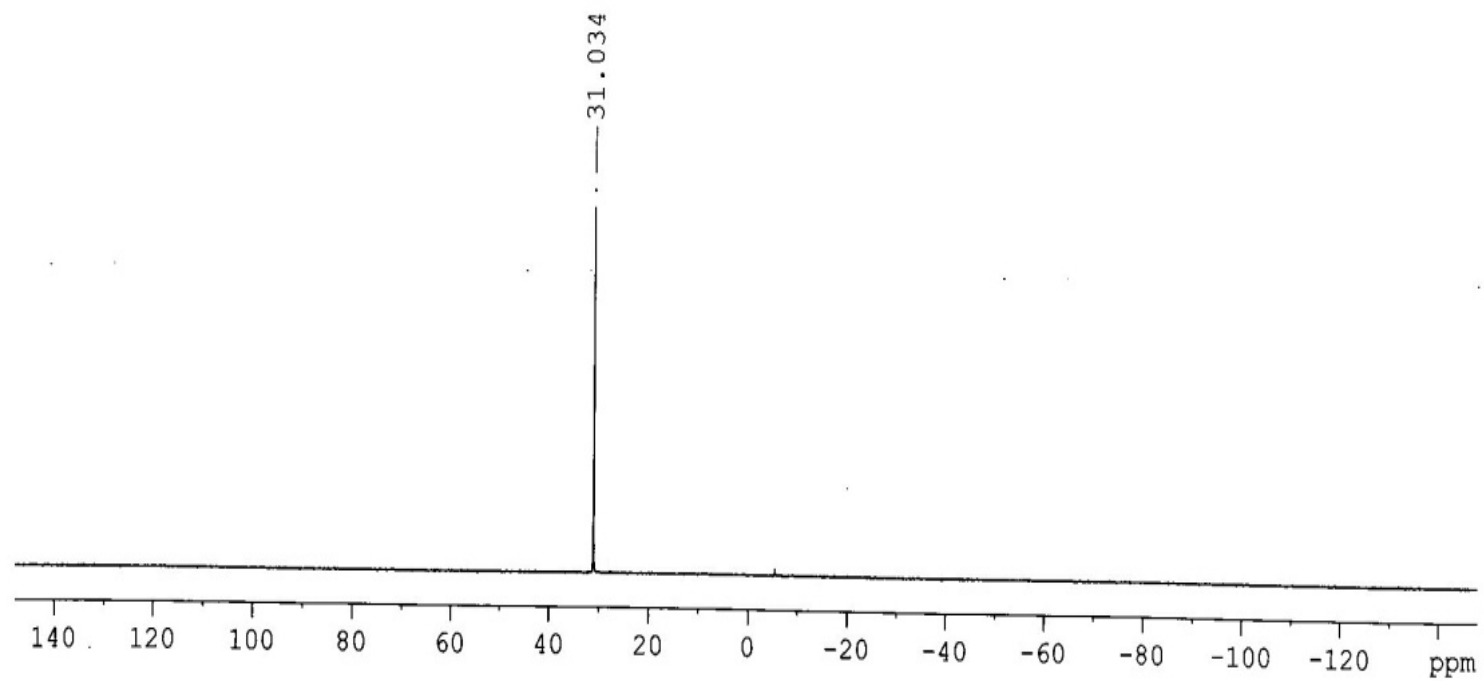

Figure S6:  $^{31}\text{P}$  NMR for Pd(II) thiocarboxamide Complex **2b**

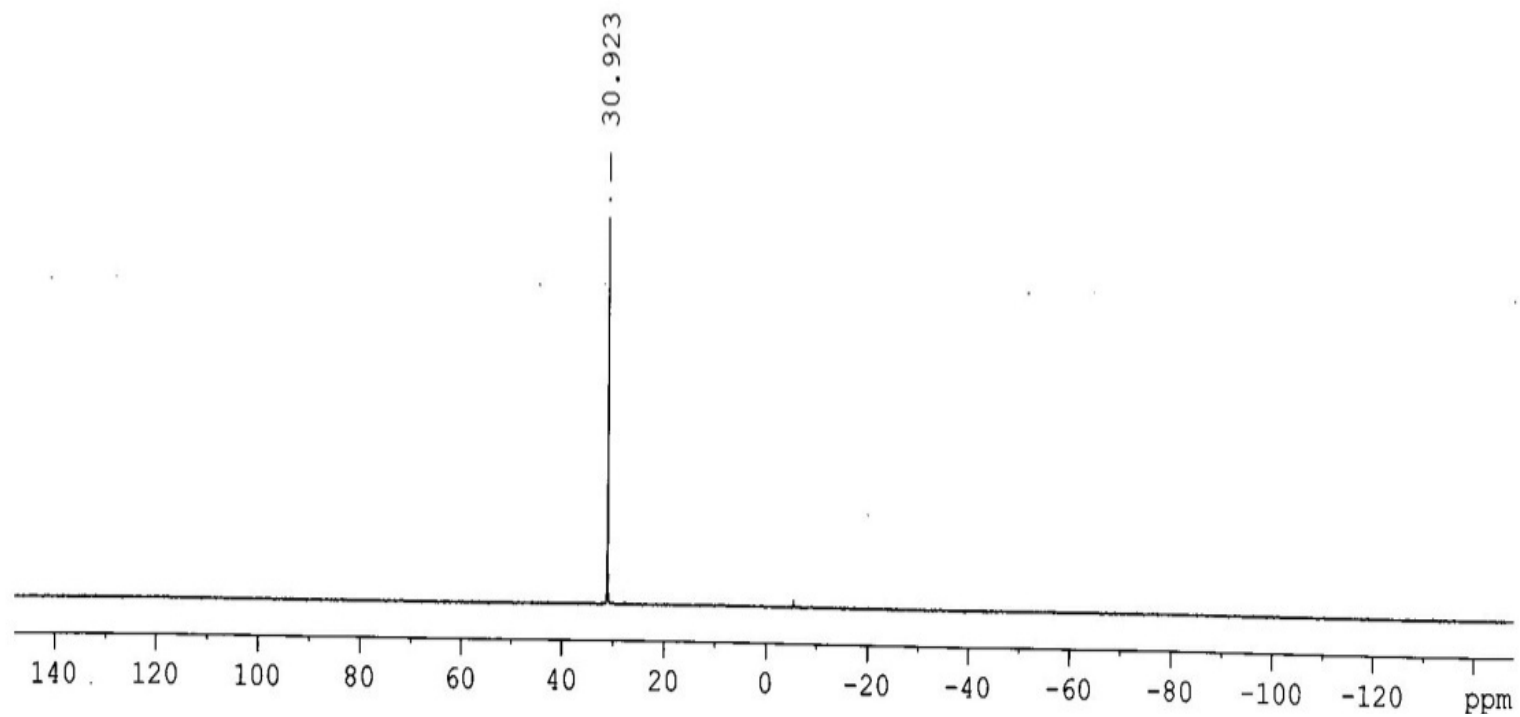

Figure S7:  $^{31}\text{P}$  NMR for Pd(II) thiocarboxamide Complex **2c**

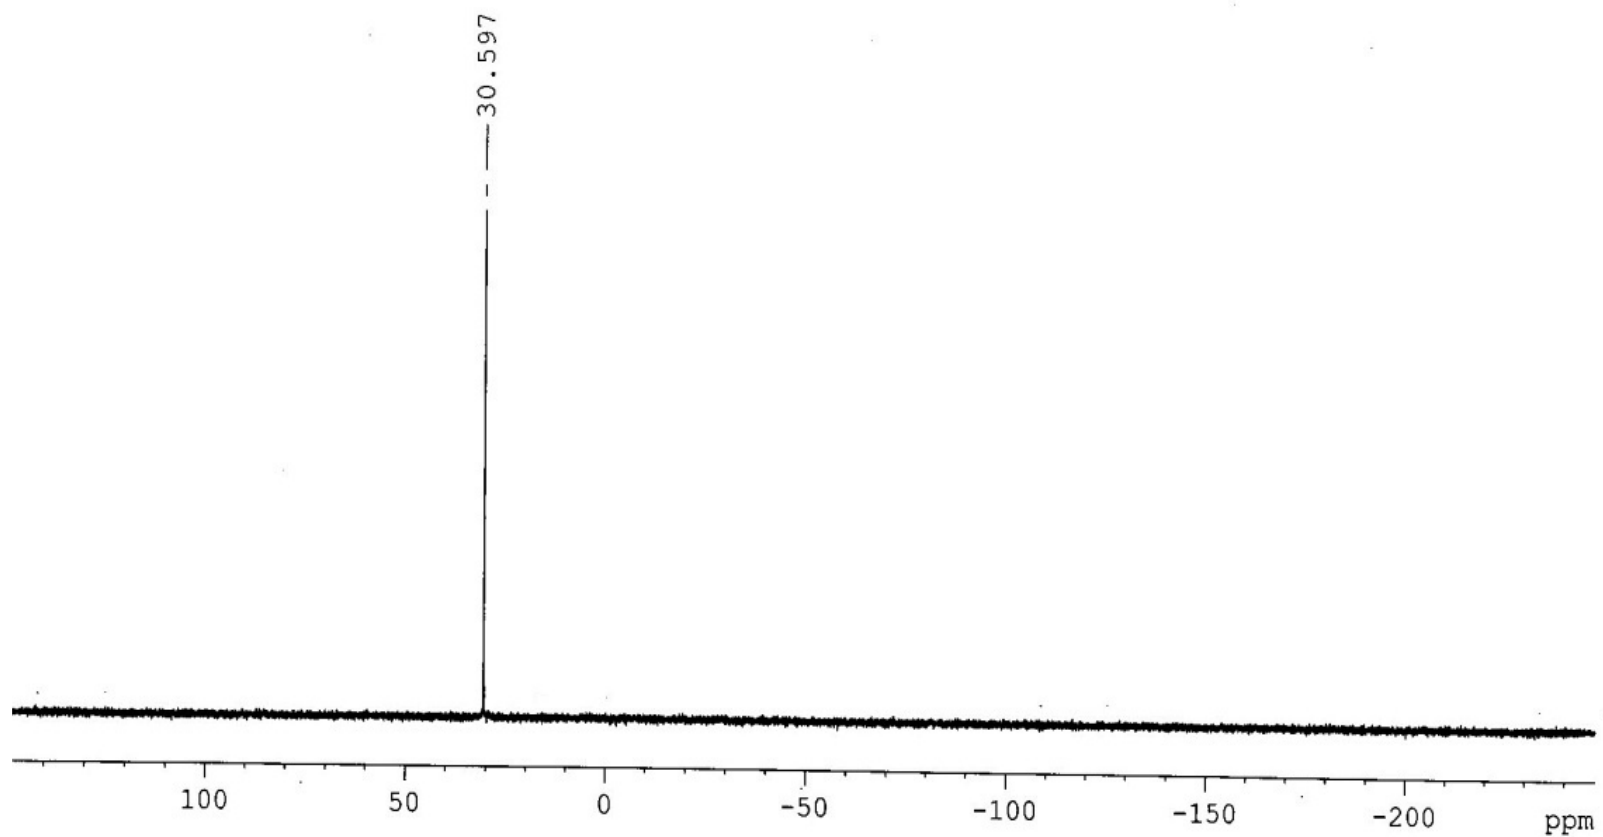

Figure S8:  $^{31}\text{P}$  NMR for Pd(II) thiocarboxamide Complex **2d**

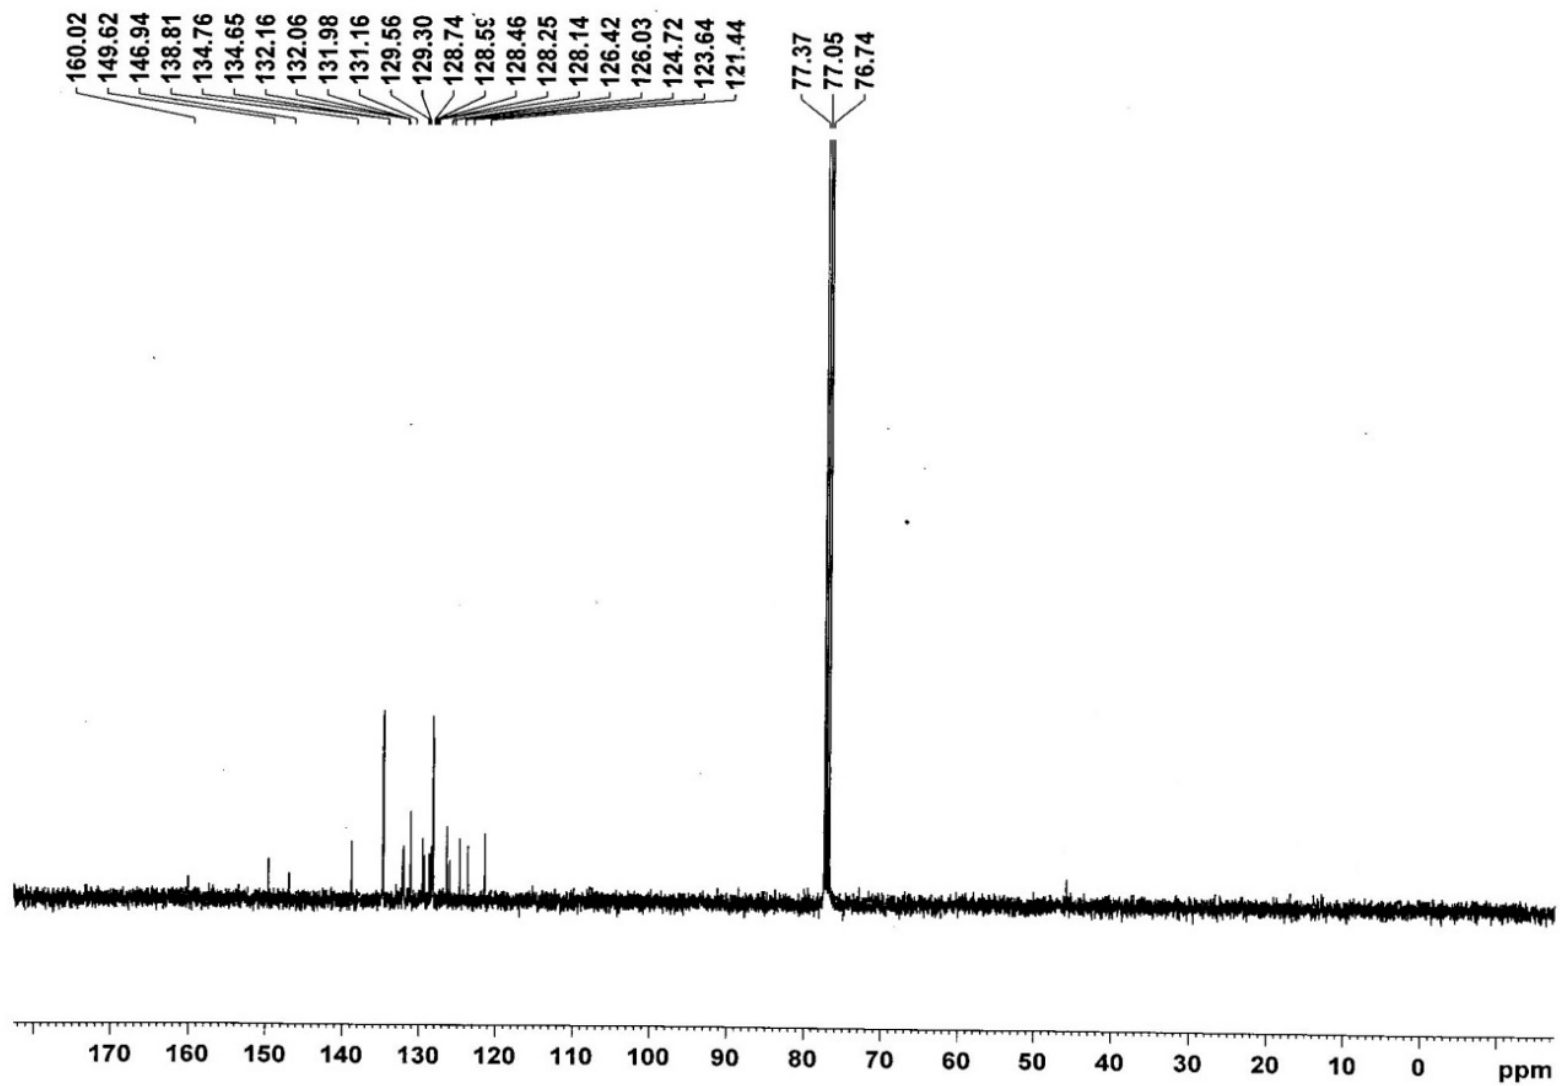

Figure S9:  $^{13}\text{C}$  NMR for Pd(II) thiocarboxamide Complex 2a



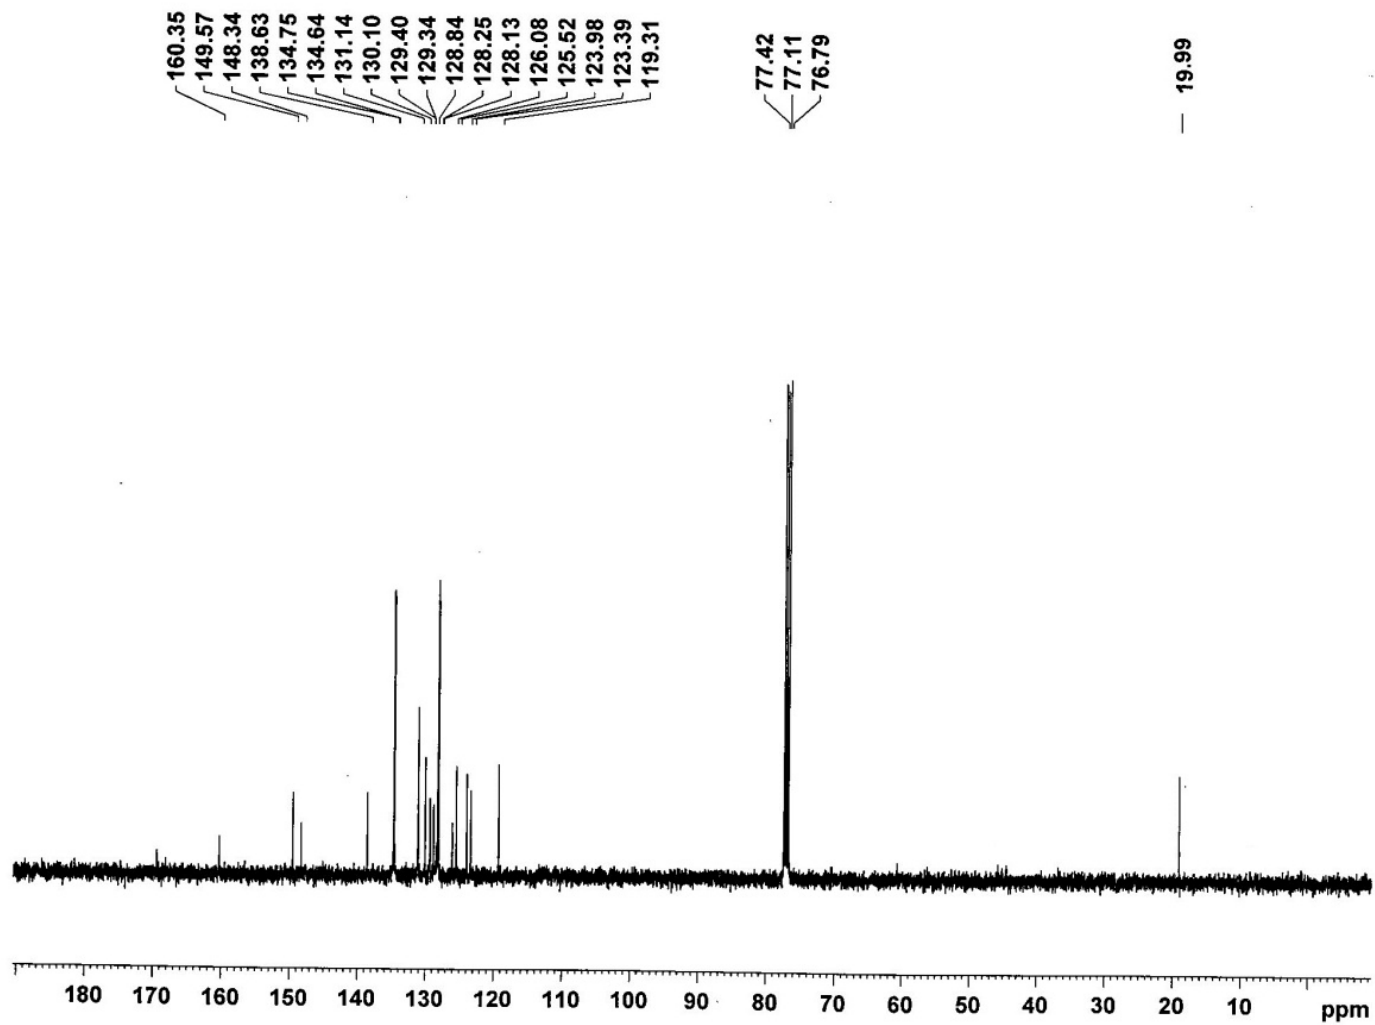

Figure S10:  $^{13}\text{C}$  NMR for Pd(II) thiocarboxamide Complex **2b**

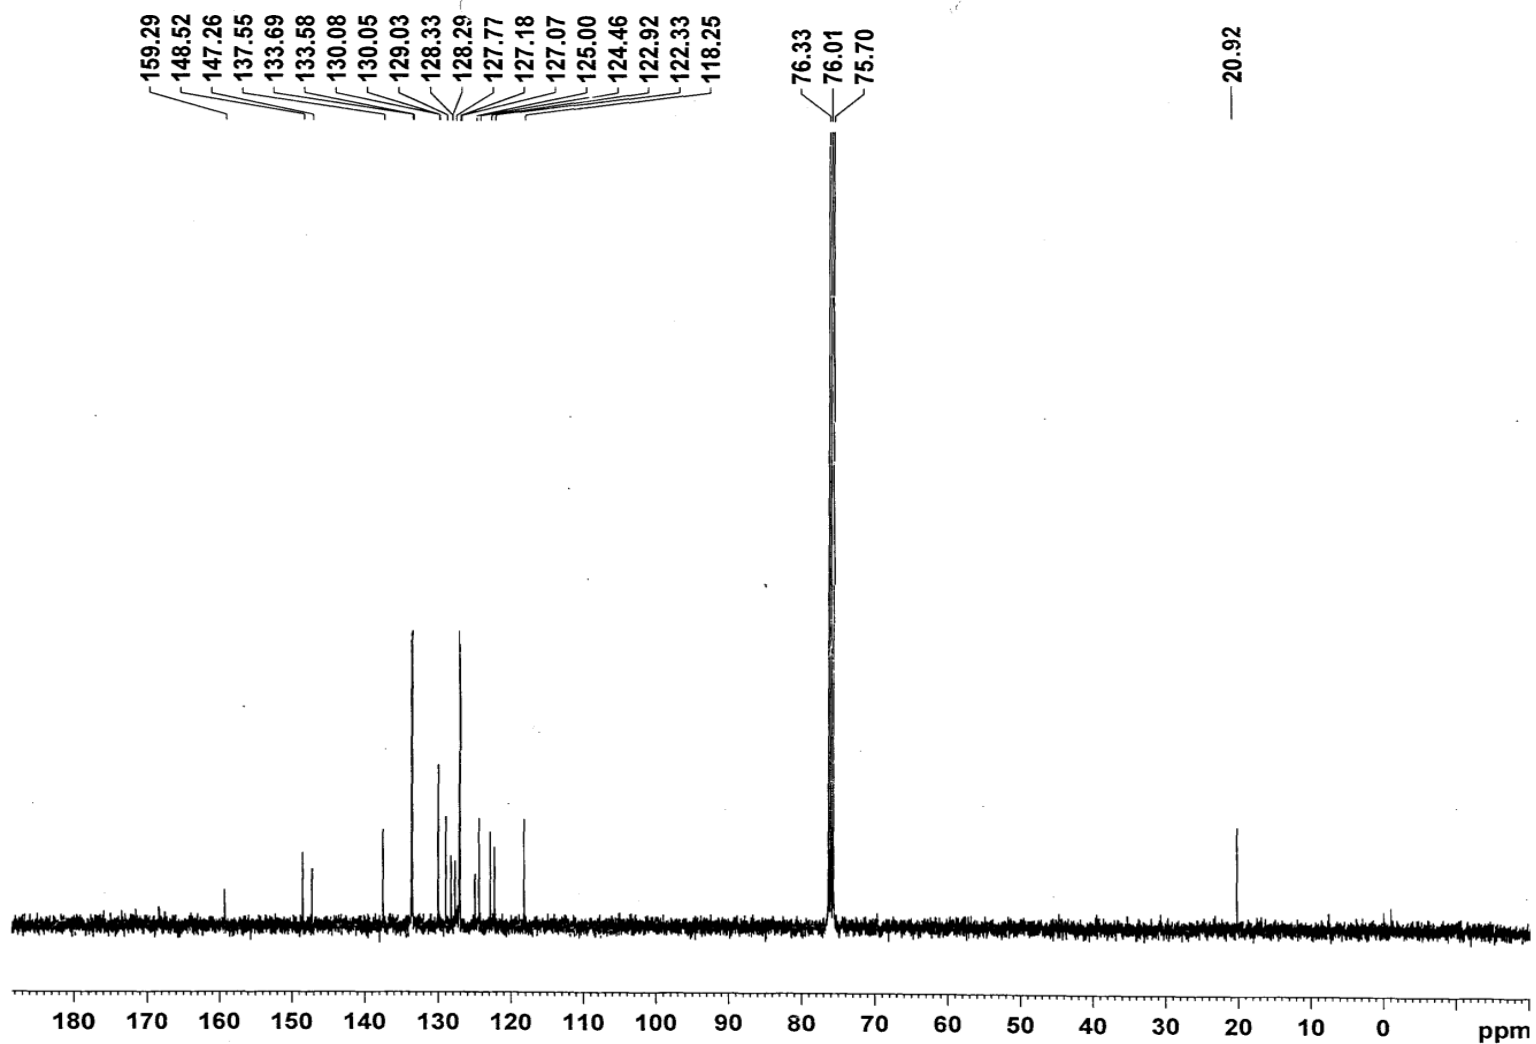

Figure S11:  $^{13}\text{C}$  NMR for Pd(II) thiocarboxamide Complex **2c**

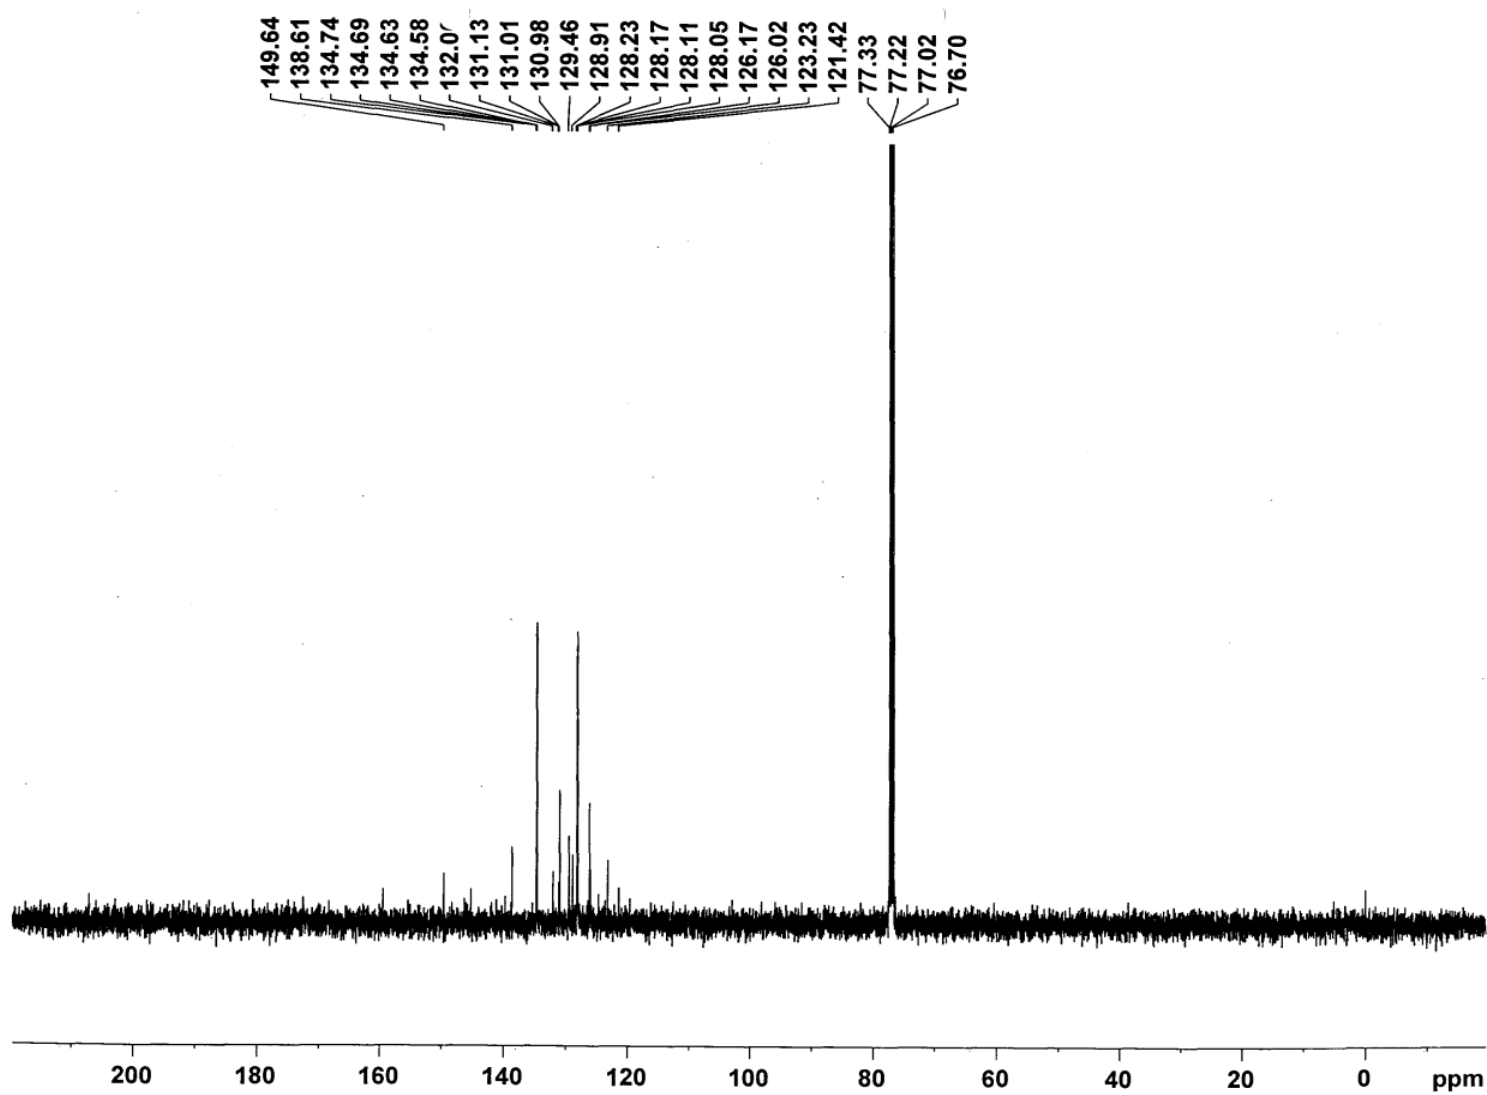

Figure S12:  $^{13}\text{C}$  NMR for Pd(II) thiocarboxamide Complex **2d**
